# Supplementary material
Source: publisher site journal article supplement (https://www.spandidos-publications.com/2380/downloadSupplementary)
Supplement: Supplementary file 1 [file downloadSupplementary]

Figure S1. OncoPrint image of TCGA analysis performed in 7,084 patients and >7,251 samples, including information on the 12 studies included, mutation frequency, and mutation types.

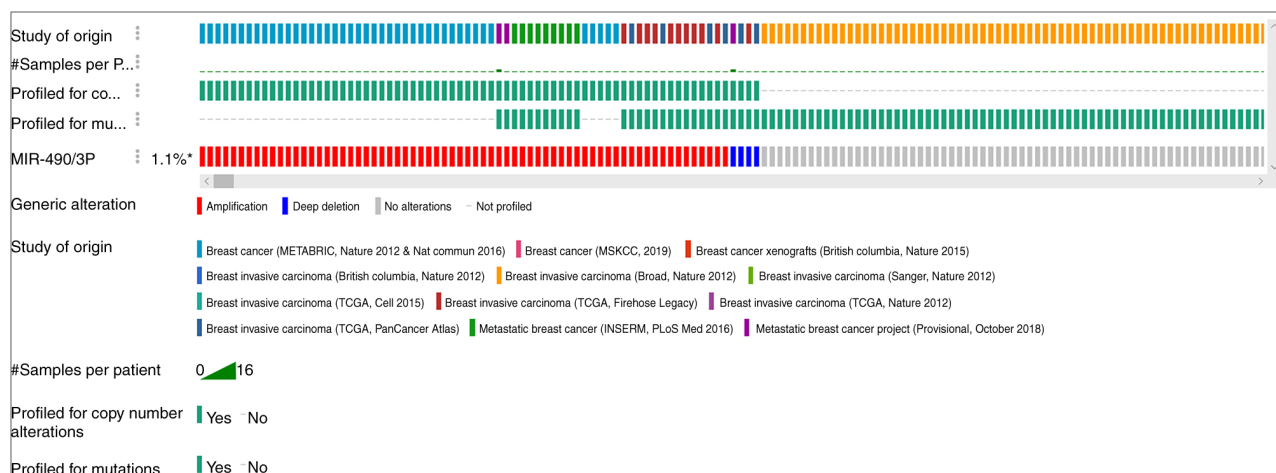

Figure S2. Percentage gene amplification and deep deletion observed for *miR-490/3P* in the different studies. Data were analyzed was from TCGA that had 7,084 patients (7,251 samples) from 12 studies. Shown are analysis based on cancer-related studies.

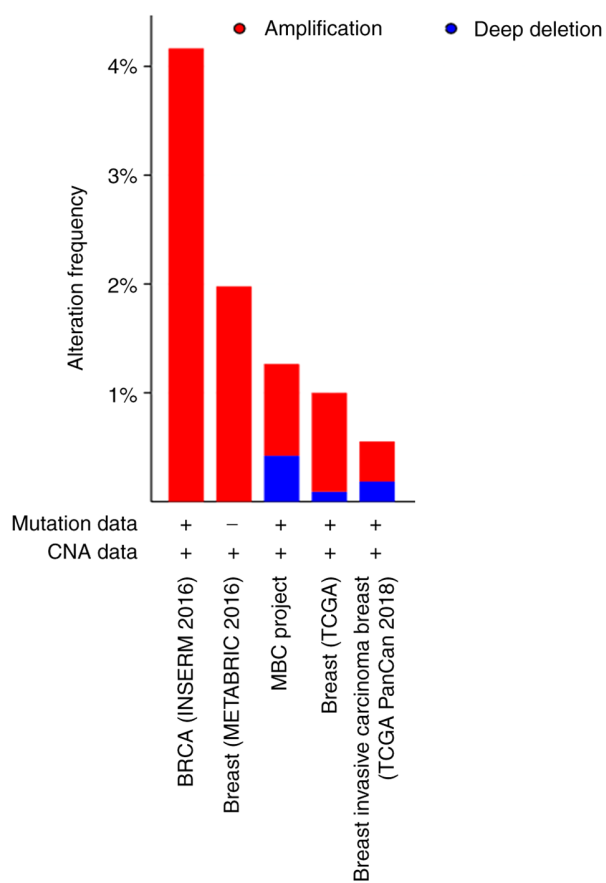

Table SI. Clinicopathological characteristics of female breast cancer patients included in the present study.

| Characteristics                                                     | DCIS (n=10) | IDC (n=35) |
|---------------------------------------------------------------------|-------------|------------|
| Age                                                                 |             |            |
| >60 years                                                           | 7           | 24         |
| ≥60 years                                                           | 3           | 11         |
| Stage                                                               |             |            |
| 0/I                                                                 | 10          | 1          |
| II                                                                  | 0           | 4          |
| IIIA                                                                | 0           | 5          |
| IIIB                                                                | 0           | 12         |
| IV                                                                  | 0           | 13         |
| N-stage                                                             |             |            |
| N0                                                                  | 10          | 0          |
| N1                                                                  | 0           | 1          |
| N2                                                                  | 0           | 24         |
| N3                                                                  | 0           | 10         |
| Molecular subtype                                                   |             |            |
| HER2 <sup>+</sup>                                                   | 7           | 12         |
| ER <sup>+</sup> PR <sup>+</sup> (Luminal A)                         | 0           | 3          |
| ER <sup>+</sup> PR <sup>-</sup> HER2 <sup>+</sup> (Luminal B)       | 2           | 9          |
| ER <sup>-</sup> PR <sup>-</sup> HER2 <sup>-</sup> (triple-negative) | 1           | 11         |
| Surgery                                                             |             |            |
| No surgery                                                          | 8           | 0          |
| Breast-conserving surgery                                           | 2           | 3          |
| Mastectomy                                                          | 0           | 32         |
| Chemotherapy/radiation                                              |             |            |
| Yes                                                                 | 10/1        | 35/29      |
| No                                                                  | 0/0         | 0/0        |

The race of all the patients was Asian. HER2, human epidermal growth factor receptor 2; ER, estrogen receptor; PR, progesterone receptor.
